# Supplementary material for: Impact of Na+ and Ca2+ Cations on the Adsorption of H2S on Binder-Free LTA Zeolites
Source: Hindawi journal article supplement (doi:10.1155/2021/5531974), 2021-01-01
Supplement: f1 [file 5531974.f1.pdf]

# Supplementary Materials

## Impact of Na<sup>+</sup> and Ca<sup>2+</sup> cations on the adsorption of H<sub>2</sub>S on binderfree LTA zeolites

Annika Starke,<sup>1</sup> Christoph Pasel,<sup>1</sup> Christian Bläker,<sup>1</sup> Tobias Eckardt,<sup>2</sup> Jens Zimmermann,<sup>3</sup> and Dieter Bathen,<sup>1,4</sup>

<sup>1</sup> University of Duisburg-Essen, Thermal Process Engineering, D-47057 Duisburg, Germany.

<sup>2</sup> BASF Catalysts Germany GmbH, D-31582 Nienburg, Germany.

<sup>3</sup> Chemiewerk Bad Köstritz GmbH, D-07586 Bad Köstritz, Germany.

<sup>4</sup> Institute of Energy and Environmental Technology IUTA e. V., D-47229 Duisburg, Germany.

Correspondence should be addressed to Annika Starke; annika.starke@uni-due.de

Table S1: Chemical properties of LTA zeolite materials (Determined by XRF (X-ray fluorescence spectroscopy))

| Zeolite        | Al <sub>2</sub> O <sub>3</sub><br>[wt%] | SiO <sub>2</sub><br>[wt%] | Na <sub>2</sub> O<br>[wt%] | CaO<br>[wt%] | Sodium<br>Exchange [%] |
|----------------|-----------------------------------------|---------------------------|----------------------------|--------------|------------------------|
| NaA BF         | 31.0                                    | 35.2                      | 19.6                       | 0.165        | 0                      |
| CaNaA(19 %) BF | 31.4                                    | 35.4                      | 16.0                       | 3.22         | 18.6                   |
| CaNaA(35 %) BF | 31.1                                    | 35.0                      | 12.5                       | 6.05         | 35.4                   |
| CaNaA(50 %) BF | 30.7                                    | 34.8                      | 9.72                       | 8.43         | 50.1                   |
| CaNaA(70 %) BF | 30.1                                    | 34.0                      | 5.66                       | 11.6         | 70.3                   |
| CaNaA(82 %) BF | 29.9                                    | 33.9                      | 3.21                       | 13.6         | 82.4                   |

Table S2: Parameters of isothermal fit of H<sub>2</sub>S on the LTA zeolites at 25 °C

| Zeolite   | X <sub>mon1</sub><br>[mol/kg] | b <sub>1</sub><br>[-] | X <sub>mon2</sub><br>[mol/kg] | b <sub>2</sub><br>[-] | R <sup>2</sup> |
|-----------|-------------------------------|-----------------------|-------------------------------|-----------------------|----------------|
| NaA       | 0.292                         | 0.066                 | 2.248                         | 2.31E-4               | 0.998          |
| CaNaA 19% | 0.558                         | 0.036                 | 2.928                         | 1.83E-4               | 0.998          |
| CaNaA 35% | 0.712                         | 0.006                 | 5.237                         | 1.00E-4               | 0.999          |
| CaNaA 50% | 0.469                         | 0.011                 | 2.526                         | 5.92E-4               | 0.999          |
| CaNaA 70% | 0.476                         | 0.020                 | 2.606                         | 7.78E-4               | 0.999          |
| CaNaA 82% | 0.930                         | 0.009                 | 2.327                         | 9.67E-4               | 0.999          |
| CaNaA 89% | 1.626                         | 0.007                 | 1.977                         | 5.55E-4               | 0.999          |
| CaNaA 92% | 0.890                         | 0.010                 | 2.485                         | 1.36E-3               | 0.999          |

18

Table S3: Parameters of isothermal fit of H<sub>2</sub>S on the LTA zeolites at 85 °C

| Zeolite   | X <sub>mon1</sub><br>[mol/kg] | b <sub>1</sub><br>[-] | X <sub>mon2</sub><br>[mol/kg] | b <sub>2</sub><br>[-] | R <sup>2</sup> |
|-----------|-------------------------------|-----------------------|-------------------------------|-----------------------|----------------|
| NaA       | 0.210                         | 0.174                 | 0.388                         | 2.62E-4               | 0.997          |
| CaNaA 19% | 0.076                         | 0.068                 | 0.371                         | 6.14E-4               | 0.998          |
| CaNaA 35% | 0.066                         | 0.008                 | 1.111                         | 1.40E-4               | 0.999          |
| CaNaA 50% | 0.044                         | 0.005                 | 2.985                         | 4.37E-5               | 0.999          |
| CaNaA 70% | 0.085                         | 0.003                 | 2.038                         | 8.21E-5               | 0.999          |
| CaNaA 82% | 0.026                         | 0.072                 | 1.788                         | 1.79E-4               | 0.999          |
| CaNaA 89% | 0.030                         | 0.026                 | 2.362                         | 1.37E-4               | 0.999          |
| CaNaA 92% | 0.017                         | 0.055                 | 2.922                         | 1.10E-4               | 0.999          |

19

Table S4: Measured equilibrium loading of H<sub>2</sub>S on the LTA zeolites at 25 °C

| Zeolite    | Concentration [ppm <sub>mol</sub> ] | Loading [mol/kg] |
|------------|-------------------------------------|------------------|
| NaA        | 43                                  | 0.24             |
|            | 187                                 | 0.35             |
|            | 412                                 | 0.49             |
|            | 620                                 | 0.57             |
|            | 826                                 | 0.66             |
|            | 1065                                | 0.73             |
|            | 1285                                | 0.79             |
|            | 1407                                | 0.82             |
|            | 1610                                | 0.90             |
|            | 1794                                | 0.95             |
|            | 1981                                | 1.00             |
| CaNaA 19 % | 48                                  | 0.38             |
|            | 191                                 | 0.57             |
|            | 411                                 | 0.73             |
|            | 615                                 | 0.84             |
|            | 825                                 | 0.93             |
|            | 1063                                | 1.04             |
|            | 1269                                | 1.09             |
|            | 1400                                | 1.13             |
|            | 1605                                | 1.19             |

20

|            |      |      |
|------------|------|------|
|            | 1795 | 1.27 |
|            | 1977 | 1.35 |
| CaNaA 35 % | 44   | 0.18 |
|            | 196  | 0.46 |
|            | 411  | 0.71 |
|            | 618  | 0.87 |
|            | 824  | 0.99 |
|            | 1068 | 1.13 |
|            | 1271 | 1.20 |
|            | 1403 | 1.28 |
|            | 1609 | 1.36 |
|            | 1790 | 1.42 |
|            | 1982 | 1.55 |
| CaNaA 50 % | 48   | 0.23 |
|            | 199  | 0.57 |
|            | 411  | 0.88 |
|            | 618  | 1.09 |
|            | 823  | 1.24 |
|            | 1064 | 1.41 |
|            | 1277 | 1.52 |
|            | 1401 | 1.58 |
|            | 1602 | 1.66 |
|            | 1788 | 1.74 |
|            | 1979 | 1.82 |
| CaNaA 70 % | 42   | 0.30 |
|            | 200  | 0.72 |
|            | 411  | 1.06 |
|            | 619  | 1.29 |
|            | 828  | 1.48 |
|            | 1068 | 1.64 |
|            | 1285 | 1.75 |
|            | 1406 | 1.81 |
|            | 1613 | 1.90 |

|            |      |      |
|------------|------|------|
|            | 1798 | 1.99 |
|            | 1984 | 2.06 |
| CaNaA 82 % | 36   | 0.27 |
|            | 199  | 0.96 |
|            | 411  | 1.39 |
|            | 620  | 1.67 |
|            | 830  | 1.85 |
|            | 1067 | 2.00 |
|            | 1285 | 2.13 |
|            | 1408 | 2.19 |
|            | 1612 | 2.27 |
|            | 1798 | 2.38 |
|            | 1982 | 2.44 |
| CaNaA 89 % | 46   | 0.43 |
|            | 199  | 1.12 |
|            | 402  | 1.54 |
|            | 618  | 1.81 |
|            | 828  | 2.00 |
|            | 1068 | 2.16 |
|            | 1283 | 2.27 |
|            | 1405 | 2.34 |
|            | 1613 | 2.42 |
|            | 1797 | 2.49 |
|            | 1980 | 2.54 |
| CaNaA 92 % | 45   | 0.38 |
|            | 201  | 1.10 |
|            | 412  | 1.58 |
|            | 619  | 1.85 |
|            | 832  | 2.08 |
|            | 1064 | 2.32 |
|            | 1273 | 2.40 |
|            | 1401 | 2.46 |
|            | 1605 | 2.52 |

1788 2.57  
1974 2.66

21  
22

Table S5: Measured equilibrium loading of H<sub>2</sub>S on the LTA zeolites at 85 °C

| Zeolite        | Concentration [ppm <sub>mol</sub> ] | Loading [mol/kg] |
|----------------|-------------------------------------|------------------|
| NaA            | 45                                  | 0.19             |
|                | 196                                 | 0.22             |
|                | 411                                 | 0.25             |
|                | 617                                 | 0.27             |
|                | 825                                 | 0.28             |
|                | 1066                                | 0.29             |
|                | 1283                                | 0.31             |
|                | 1404                                | 0.31             |
|                | 1610                                | 0.32             |
|                | 1796                                | 0.33             |
|                | 1983                                | 0.35             |
| CaNaA(19 %) BF | 48                                  | 0.07             |
|                | 199                                 | 0.11             |
|                | 411                                 | 0.15             |
|                | 617                                 | 0.17             |
|                | 827                                 | 0.20             |
|                | 1068                                | 0.22             |
|                | 1283                                | 0.24             |
|                | 1403                                | 0.25             |
|                | 1609                                | 0.26             |
|                | 1793                                | 0.27             |
|                | 1979                                | 0.28             |
| CaNaA(35 %) BF | 48                                  | 0.03             |
|                | 200                                 | 0.07             |
|                | 412                                 | 0.11             |
|                | 618                                 | 0.14             |
|                | 828                                 | 0.17             |
|                | 1068                                | 0.21             |
|                | 1284                                | 0.23             |

|                |      |      |
|----------------|------|------|
|                | 1404 | 0.24 |
|                | 1611 | 0.26 |
|                | 1796 | 0.29 |
|                | 1981 | 0.30 |
| CaNaA(50 %) BF | 45   | 0.01 |
|                | 201  | 0.05 |
|                | 411  | 0.08 |
|                | 619  | 0.11 |
|                | 826  | 0.14 |
|                | 1065 | 0.17 |
|                | 1281 | 0.20 |
|                | 1402 | 0.21 |
|                | 1611 | 0.24 |
|                | 1793 | 0.26 |
|                | 1980 | 0.28 |
| CaNaA(70 %) BF | 47   | 0.02 |
|                | 200  | 0.06 |
|                | 410  | 0.11 |
|                | 617  | 0.15 |
|                | 824  | 0.19 |
|                | 1063 | 0.23 |
|                | 1280 | 0.26 |
|                | 1400 | 0.28 |
|                | 1604 | 0.31 |
|                | 1788 | 0.33 |
|                | 1973 | 0.36 |
| CaNaA(82 %) BF | 49   | 0.04 |
|                | 200  | 0.07 |
|                | 411  | 0.15 |
|                | 618  | 0.20 |
|                | 823  | 0.25 |
|                | 1064 | 0.31 |
|                | 1281 | 0.36 |

|                |      |      |
|----------------|------|------|
|                | 1402 | 0.39 |
|                | 1607 | 0.42 |
|                | 1790 | 0.46 |
|                | 1975 | 0.49 |
| CaNaA(89 %) BF | 49   | 0.03 |
|                | 199  | 0.09 |
|                | 411  | 0.15 |
|                | 619  | 0.22 |
|                | 826  | 0.27 |
|                | 1064 | 0.33 |
|                | 1279 | 0.38 |
|                | 1398 | 0.41 |
|                | 1604 | 0.45 |
|                | 1786 | 0.49 |
|                | 1972 | 0.53 |
| CaNaA(92 %) BF | 50   | 0.03 |
|                | 201  | 0.08 |
|                | 412  | 0.15 |
|                | 620  | 0.21 |
|                | 829  | 0.27 |
|                | 1067 | 0.33 |
|                | 1282 | 0.38 |
|                | 1404 | 0.41 |
|                | 1615 | 0.46 |
|                | 1798 | 0.50 |
|                | 1983 | 0.54 |

23

24 Table S6: Massbalance after H<sub>2</sub>S desorption at 25 °C for some of the materials. Desorption was measured  
25 immediately after adsorption until no concentration was detectable by μ-GC.

| Zeolite | Concentration<br>[ppm <sub>mol</sub> ] | Loading after<br>adsorption<br>[mol/kg] | Loading which<br>desorpted<br>[mol/kg] | Difference<br>[mol/kg] |
|---------|----------------------------------------|-----------------------------------------|----------------------------------------|------------------------|
| NaA     | 1727.73                                | 0.95                                    | 0.78                                   | 0.17                   |

|             |         |      |      |      |
|-------------|---------|------|------|------|
| CaNaA(19 %) | 1500.20 | 1.02 | 0.93 | 0.09 |
| CaNaA(35 %) | 1498.46 | 1.23 | 1.21 | 0.02 |

---
